# Supplementary material
Source: PubMed Central journal article supplement (PMC7830825)
Supplement: NIHMS1661522-supplement-Appendix_1.pdf [file NIHMS1661522-supplement-Appendix_1.pdf]

## **Appendix 1.**

A listing of the SENCE sites with participating principal investigators (PI), co-investigators (I) and coordinators (C) ordered by the number of participants recruited per site:

**Boston, MA Joslin Diabetes Center- Pediatric** (n=24) Lori Laffel (PI); Persis Commissariat (I); Kara Harrington (I); Amanda Whitehouse (C); Alina Cheema (C)

**Indianapolis, IN Riley Hospital for Children, Indiana University School of Medicine** (n=20) Linda DiMeglio (PI); Manasa Mantravadi (I); Stephanie Woerner (C)

**New Haven, CT Yale Pediatric Diabetes Program** (n=19) William Tamborlane (PI); Michelle Van Name (I); Amy Steffen (C); Yejin Lee (C); Jennifer Finnegan (C)

**Houston, TX Baylor College of Medicine / Texas Children's Hospital** (n=16) Marisa Hilliard (PI); Daniel DeSalvo (I); Barbara Anderson (I); Wendy Levy (C)
